# Supplementary material
Source: PubMed Central journal article supplement (PMC4178661)
Supplement: AEM.01696-14_zam999105709so1.pdf [file AEM.01696-14_zam999105709so1.pdf]

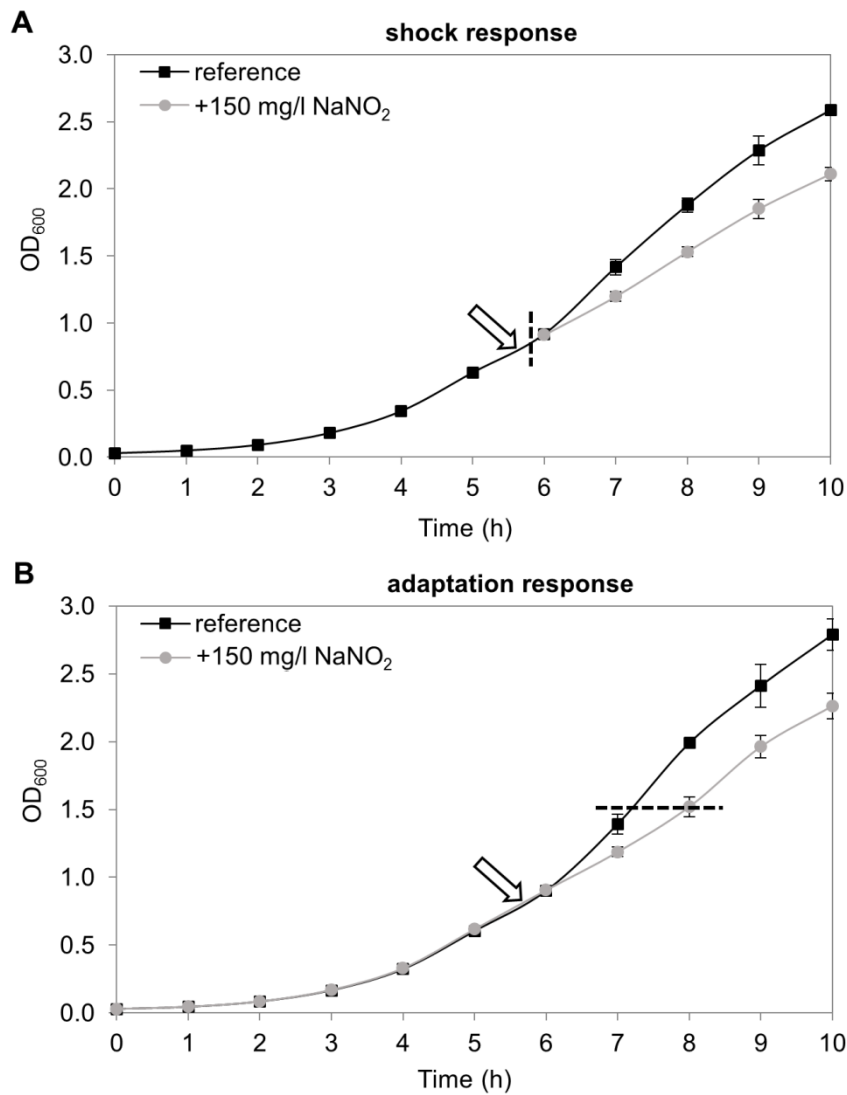

**FIG S1:** Growth curves of *S. Typhimurium* 14028 WT illustrating the experimental set-ups for the analysis of the transcriptional response to acidified NaNO<sub>2</sub> shock (A) and adaptation (B). Growth of shaken flask cultures of the reference culture without NaNO<sub>2</sub> (black square) and the culture to which 150 mg/l NaNO<sub>2</sub> was added (grey circle) at 24°C was recorded. Data represent mean values and standard deviations from three independent experiments. The arrow indicates the time-point (OD<sub>600</sub> = 0.80-0.85), at which 150 mg/l NaNO<sub>2</sub> was added. The time points of harvesting the cultures for RNA extraction (A: 10 min after addition of NaNO<sub>2</sub>, B: OD<sub>600</sub> = 1.5) are indicated by the dashed line.

**Table S1: Gene-specific primer sets used for qPCR**

| Gene name   | 14028 identifier | Forward primer (5' to 3') | Reverse primer (5' to 3') | Amplicon size |
|-------------|------------------|---------------------------|---------------------------|---------------|
| 16S rDNA    |                  | GTCTGTCAAGTCGGATGTG       | AGATCTCTACGCATTTACC       | 122 bp        |
| <i>ampD</i> | STM14_0175       | ATTATTCACCGGAACGATAG      | ACATACTGGACGATTTACC       | 114 bp        |
| <i>fhuA</i> | STM14_0228       | GCCTCTATGTTTCAGGATCAG     | AACTGGTGGTCATTACGTTT      | 145 bp        |
| <i>speF</i> | STM14_0818       | ACAATTTATTCCGATGATGG      | TTATGGATCTGCGAGGTCT       | 132 bp        |
| <i>potB</i> | STM14_1402       | CGTGATTGATACACCGATT       | TAGTGGTTTGTGCGAGCTTCT     | 127 bp        |
| <i>purB</i> | STM14_1410       | ATCAGTTCAGCGAAGAGTTC      | GATCAGGATGGTGTAAAGC       | 128 bp        |
| <i>ttrC</i> | STM14_1678       | TATGCACACTGCTGTTCTGT      | CGGTTTGTACCTGAATCAAC      | 132 bp        |
| <i>hdeB</i> | STM14_1885       | TTACGCCTAAAGGTATGAGC      | ACTGCTGTCGTCAGTTTC        | 145 bp        |
| <i>fliF</i> | STM14_2390       | TGCTAATGATGTGGAAAGC       | CTTTATTGGCAAAATCCAAC      | 116 bp        |
| <i>hmpA</i> | STM14_3135       | CCGAGATTTATCACGAGAAC      | GACTGGTTCAAACCTCAAAGC     | 119 bp        |
| <i>cadA</i> | STM14_3138       | TCATTTATGAAACCCAGTCC      | TGGTGGTATGCATCATGTAG      | 123 bp        |
| <i>yfiA</i> | STM14_3266       | ATTAATACACCGAACGGACA      | TTGTGCTGCACTTTATTGAG      | 113 bp        |
| <i>norV</i> | STM14_3431       | GCTACTACGCCAATATCCTG      | GCCCATTTTCAGATACAGTTC     | 160 bp        |
| <i>yhbU</i> | STM14_3956       | CGCTGCTATCTTTCTTCCTA      | GTAACGGTCAATCAGGACAT      | 138 bp        |
| <i>rplM</i> | STM14_4037       | AATACACTCCGCACGTAGAT      | AAAGGTCGCTTGTTTGATAC      | 140 bp        |
| <i>rpsH</i> | STM14_4129       | CCAGGGTAAAGCTGTTGTAG      | TGCACGATCAGTCATAACAC      | 148 bp        |
| <i>feoB</i> | STM14_4222       | ATTCAATGGATTGGCTACAC      | GGAGAGGAACAGGTACATCA      | 132 bp        |
| <i>pyrE</i> | STM14_4495       | GTA CTGCTTTAACCGCAAAG     | CGCCTGAATAATCTCCATT       | 145 bp        |
| <i>rnpA</i> | STM14_4635       | TCCCCGTATCGGTCTTAC        | GAAATCCATTGCAGGAAGT       | 124 bp        |
| <i>nrfA</i> | STM14_5143       | CGGAATATGAAACCTGGAG       | CGATTTTATGGTCGGTGTAG      | 117 bp        |
| <i>adi</i>  | STM14_5169       | CACGCACAAACTACTGAATG      | CATATAACGGAGAGGTGGTG      | 128 bp        |
| -           | STM14_5179       | CTGTCGTTATTGTGAAATGC      | AAGAATCCACACAAATAGGG      | 131 bp        |
| -           | STM14_5361       | TGTTGATCGGTATGTCTGAA      | GTGTCAAGGTGCATACAGG       | 136 bp        |

**Table S2: Up-regulated genes under acidified NaNO<sub>2</sub> shock in *S. Typhimurium* 14028 WT**

| COG                                                | 14028 identifier | LT2 identifier | Gene name                | Product                                                             | log <sub>2</sub> FC | p-value (BH-adjusted) |
|----------------------------------------------------|------------------|----------------|--------------------------|---------------------------------------------------------------------|---------------------|-----------------------|
| <i>Energy production &amp; conversion (C)</i>      |                  |                |                          |                                                                     |                     |                       |
| COG1151C                                           | STM14_1052       | STM0937        | <i>hcp</i>               | hydroxylamine reductase                                             | 2.90                | 3.21E-03              |
| COG0247C                                           | STM14_2821       | STM2286        | <i>glpC</i>              | sn-glycerol-3-phosphate dehydrogenase subunit C                     | 2.06                | 4.85E-02              |
| COG1018C                                           | STM14_3135       | STM2556        | <i>hmpA</i>              | nitric oxide dioxygenase                                            | 6.49                | 4.38E-12              |
| *COG1819GC                                         | STM14_3344       | STM2773        | <i>iroB</i>              | putative glycosyl transferase                                       | 2.49                | 1.60E-02              |
| COG0426C                                           | STM14_3431       | STM2840        | <i>norV</i> <sup>1</sup> | anaerobic nitric oxide reductase flavorubredoxin                    | 8.44                | 8.43E-17              |
| COG1902C                                           | STM14_3898       | STM3219        | <i>fadh</i>              | 2,4-dienoyl-CoA reductase                                           | 2.99                | 1.69E-03              |
| *COG0604CR                                         | STM14_5103       | STM4245        | <i>qor</i>               | quinone oxidoreductase                                              | 1.96                | 4.69E-02              |
| <i>Carbohydrate transport &amp; metabolism (G)</i> |                  |                |                          |                                                                     |                     |                       |
| COG1440G                                           | STM14_1594       | STM1312        | <i>celA</i>              | PTS system N,N'-diacetylchitobiose-specific transporter subunit IIB | 2.06                | 3.47E-02              |
| COG1447G                                           | STM14_1596       | STM1314        | <i>celC</i>              | PTS system N,N'-diacetylchitobiose-specific transporter subunit IIA | 2.27                | 1.85E-02              |
| COG2814G                                           | STM14_2686       | STM2179        | -                        | putative sugar transporter                                          | 2.34                | 4.04E-02              |
| *COG1819GC                                         | STM14_3344       | STM2773        | <i>iroB</i>              | putative glycosyl transferase                                       | 2.49                | 1.60E-02              |
| COG2271G                                           | STM14_3791       | STM3134        | -                        | putative permease                                                   | 3.34                | 3.55E-04              |
| COG1312G                                           | STM14_3795       | STM3135        | -                        | mannonate dehydratase                                               | 2.17                | 2.45E-02              |
| COG0246G                                           | STM14_3796       | STM3136        | -                        | putative D-mannonate oxidoreductase                                 | 2.19                | 2.37E-02              |
| COG3836G                                           | STM14_3931       | STM3249        | <i>garL</i>              | alpha-dehydro-beta-deoxy-D-glucarate aldolase                       | 2.32                | 3.37E-02              |
| COG0524G                                           | STM14_4272       | STM3547.Sc     | -                        | putative transcriptional regulator                                  | 2.13                | 3.43E-02              |
| COG3775G                                           | STM14_4561       | STM3782        | -                        | putative PTS system galactitol-specific enzyme IIC component        | 2.20                | 2.60E-02              |
| *COG1762GT                                         | STM14_4563       | STM3784        | -                        | phosphotransferase system mannitol/fructose-specific IIA component  | 2.34                | 1.36E-02              |
| COG2814G                                           | STM14_5161       | STM4290        | <i>proP</i>              | proline/glycine betaine transporter                                 | 2.11                | 2.92E-02              |
| *COG2610GE                                         | STM14_5378       | STM4482        | <i>idnT</i>              | L-idonate transport protein                                         | 3.12                | 3.33E-03              |
| <i>Amino acid transport &amp; metabolism (E)</i>   |                  |                |                          |                                                                     |                     |                       |
| COG1280E                                           | STM14_0427       | STM0365        | <i>yahN</i>              | putative transport protein                                          | 2.04                | 4.39E-02              |
| COG3075E                                           | STM14_2820       | STM2285        | <i>glpB</i>              | anaerobic glycerol-3-phosphate dehydrogenase subunit B              | 2.97                | 1.23E-02              |
| COG0531E                                           | STM14_3137       | STM2558        | <i>cadB</i>              | lysine/cadaverine antiporter                                        | 4.81                | 6.92E-07              |
| COG1982E                                           | STM14_3138       | STM2559        | <i>cada</i>              | lysine decarboxylase 1                                              | 4.17                | 9.28E-06              |

|                                                                           |            |         |             |                                                              |      |          |
|---------------------------------------------------------------------------|------------|---------|-------------|--------------------------------------------------------------|------|----------|
| COG3104E                                                                  | STM14_4321 | STM3592 | <i>yhiP</i> | inner membrane transporter YhiP                              | 2.80 | 2.74E-03 |
| COG0747E                                                                  | STM14_4375 | STM3630 | <i>dppA</i> | dipeptide transport protein                                  | 3.22 | 4.43E-04 |
| COG0002E                                                                  | STM14_4956 | STM4121 | <i>argC</i> | N-acetyl-gamma-glutamyl-phosphate reductase                  | 2.92 | 6.11E-03 |
| COG0531E                                                                  | STM14_5166 | STM4294 | <i>yjdE</i> | arginine:agmatin antiporter                                  | 4.03 | 1.85E-05 |
| COG1982E                                                                  | STM14_5169 | STM4296 | <i>adi</i>  | catabolic arginine decarboxylase                             | 5.40 | 3.97E-09 |
| *COG2610GE                                                                | STM14_5378 | STM4482 | <i>idnT</i> | L-idonate transport protein                                  | 3.12 | 3.33E-03 |
| *COG0601EP                                                                | STM14_4373 | STM3629 | <i>dppB</i> | dipeptide transporter permease DppB                          | 2.30 | 3.32E-02 |
| <i>Coenzyme transport &amp; metabolism (H)</i>                            |            |         |             |                                                              |      |          |
| COG0746H                                                                  | STM14_4803 | STM3994 | <i>mobA</i> | molybdopterin-guanine dinucleotide biosynthesis protein MobA | 2.07 | 3.64E-02 |
| <i>Lipid transport &amp; metabolism (I)</i>                               |            |         |             |                                                              |      |          |
| COG1960I                                                                  | STM14_0365 | STM0309 | <i>fadE</i> | acyl-CoA dehydrogenase                                       | 2.11 | 3.03E-02 |
| COG1250I                                                                  | STM14_2937 | STM2388 | <i>fadJ</i> | multifunctional fatty acid oxidation complex subunit alpha   | 2.02 | 3.93E-02 |
| <i>Inorganic ion transport &amp; metabolism (P)</i>                       |            |         |             |                                                              |      |          |
| COG1464P                                                                  | STM14_0600 | STM0510 | <i>sfbA</i> | ABC transporter ATP-binding protein                          | 3.00 | 1.63E-03 |
| COG1135P                                                                  | STM14_0601 | STM0511 | <i>sfbB</i> | ABC transporter ATP-binding protein                          | 2.19 | 2.90E-02 |
| COG0783P                                                                  | STM14_0966 | STM0831 | <i>dps</i>  | DNA starvation/stationary phase protection protein Dps       | 1.95 | 4.39E-02 |
| COG3615P                                                                  | STM14_1534 | STM1271 | <i>yeaR</i> | putative cytoplasmic protein                                 | 2.60 | 8.23E-03 |
| COG3615P                                                                  | STM14_2185 | STM1808 | -           | putative cytoplasmic protein                                 | 6.67 | 4.38E-12 |
| COG4771P                                                                  | STM14_3348 | STM2777 | <i>iroN</i> | outer membrane receptor FepA                                 | 2.13 | 3.10E-02 |
| *COG0601EP                                                                | STM14_4373 | STM3629 | <i>dppB</i> | dipeptide transporter permease DppB                          | 2.30 | 3.32E-02 |
| <i>Secondary metabolites biosynthesis, transport &amp; catabolism (Q)</i> |            |         |             |                                                              |      |          |
| COG1228Q                                                                  | STM14_0913 | STM0787 | <i>hutI</i> | imidazolonepropionase                                        | 2.31 | 1.77E-02 |
| COG0412Q                                                                  | STM14_4773 | STM3967 | <i>dlhH</i> | putative dienelactone hydrolase                              | 2.40 | 2.03E-02 |
| <i>Translation, ribosomal structure &amp; biogenesis (J)</i>              |            |         |             |                                                              |      |          |
| COG1544J                                                                  | STM14_3266 | STM2665 | <i>yfiA</i> | translation inhibitor protein RaiA                           | 3.58 | 7.63E-05 |
| COG1544J                                                                  | STM14_4009 | STM3321 | <i>yhbH</i> | putative sigma(54) modulation protein                        | 2.02 | 3.64E-02 |
| <i>Transcription (K)</i>                                                  |            |         |             |                                                              |      |          |
| COG2188K                                                                  | STM14_0915 | STM0789 | <i>hutC</i> | histidine utilization repressor                              | 2.65 | 9.13E-03 |
| *COG2197TK                                                                | STM14_1526 | STM1265 | -           | putative response regulator                                  | 1.97 | 4.28E-02 |
| *COG2197TK                                                                | STM14_3463 | STM2866 | <i>sprB</i> | transcriptional regulator                                    | 2.34 | 1.40E-02 |
| COG2207K                                                                  | STM14_3465 | STM2867 | <i>hilC</i> | invasion regulatory protein                                  | 1.92 | 4.73E-02 |
| COG2732K                                                                  | STM14_4057 | STM3363 | <i>yhcO</i> | putative cytoplasmic protein                                 | 2.11 | 3.37E-02 |
| COG2944K                                                                  | STM14_4398 | STM3648 | <i>yiaG</i> | putative transcriptional regulator                           | 2.73 | 3.42E-03 |
| COG2944K                                                                  | STM14_4557 | STM3778 | -           | putative DNA-binding protein                                 | 2.03 | 4.50E-02 |
| COG0583K                                                                  | STM14_4693 | STM3897 | <i>yifA</i> | transcriptional regulator HdfR                               | 2.42 | 1.06E-02 |
| COG2207K                                                                  | STM14_5314 | STM4423 | -           | putative DNA-binding protein                                 | 2.81 | 4.35E-03 |
| <i>Replication, recombination &amp; repair (L)</i>                        |            |         |             |                                                              |      |          |

|                                                                         |            |           |                         |                                                                    |      |          |
|-------------------------------------------------------------------------|------------|-----------|-------------------------|--------------------------------------------------------------------|------|----------|
| COG0350L                                                                | STM14_2006 | STM1659   | <i>ogt</i>              | O-6-alkylguanine-DNA:cysteine-protein methyltransferase            | 2.21 | 2.21E-02 |
| <i>Cell cycle control, cell division, chromosome partitioning (D)</i>   |            |           |                         |                                                                    |      |          |
| COG2846D                                                                | STM14_5283 | STM4399   | <i>ytfE</i>             | cell morphogenesis/cell wall metabolism regulator                  | 6.06 | 1.77E-10 |
| <i>Signal transduction mechanisms (T)</i>                               |            |           |                         |                                                                    |      |          |
| COG0589T                                                                | STM14_0713 | STM0614   | <i>ybdQ</i>             | putative universal stress protein                                  | 1.99 | 3.89E-02 |
| *COG2197TK                                                              | STM14_1526 | STM1265   | -                       | putative response regulator                                        | 1.97 | 4.28E-02 |
| COG2766T                                                                | STM14_1558 | STM1285   | <i>yeaG</i>             | putative serine protein kinase                                     | 2.16 | 2.45E-02 |
| COG0589T                                                                | STM14_2344 | STM1927   | <i>yecG</i>             | universal stress protein UspC                                      | 2.42 | 1.95E-02 |
| *COG2197TK                                                              | STM14_3463 | STM2866   | <i>sprB</i>             | transcriptional regulator                                          | 2.34 | 1.40E-02 |
| *COG0840NT                                                              | STM14_3893 | STM3216   | -                       | putative methyl-accepting chemotaxis protein                       | 1.92 | 4.85E-02 |
| *COG0840NT                                                              | STM14_4305 | STM3577   | <i>tcp</i>              | methyl-accepting transmembrane citrate/phenol chemoreceptor        | 2.45 | 9.17E-03 |
| *COG1762GT                                                              | STM14_4563 | STM3784   | -                       | phosphotransferase system mannitol/fructose-specific IIA component | 2.34 | 1.36E-02 |
| <i>Cell motility (N)</i>                                                |            |           |                         |                                                                    |      |          |
| *COG0840NT                                                              | STM14_3893 | STM3216   | -                       | putative methyl-accepting chemotaxis protein                       | 1.92 | 4.85E-02 |
| *COG0840NT                                                              | STM14_4305 | STM3577   | <i>tcp</i>              | methyl-accepting transmembrane citrate/phenol chemoreceptor        | 2.45 | 9.17E-03 |
| <i>Posttranslational modification, protein turnover, chaperones (O)</i> |            |           |                         |                                                                    |      |          |
| COG0071O                                                                | STM14_1509 | STM1251   | -                       | putative molecular chaperone                                       | 2.00 | 3.74E-02 |
| COG1764O                                                                | STM14_1886 | STM1563   | <i>osmC</i>             | putative envelope protein                                          | 2.96 | 1.78E-03 |
| COG0695O                                                                | STM14_3387 | STM2805   | <i>nrdH</i>             | glutaredoxin-like protein                                          | 3.10 | 1.56E-03 |
| <i>General function prediction only (R)</i>                             |            |           |                         |                                                                    |      |          |
| COG0446R                                                                | STM14_3432 | STM2841   | <i>norW<sup>1</sup></i> | nitric oxide reductase                                             | 7.49 | 1.33E-13 |
| COG1203R                                                                | STM14_3548 | STM2944   | <i>ygcB</i>             | putative helicase                                                  | 3.31 | 3.55E-04 |
| *COG0604CR                                                              | STM14_5103 | STM4245   | <i>qor</i>              | quinone oxidoreductase                                             | 1.96 | 4.69E-02 |
| <i>Function unknown (S)</i>                                             |            |           |                         |                                                                    |      |          |
| COG3123S                                                                | STM14_0462 | STM0391   | <i>yaiE</i>             | hypothetical protein                                               | 2.12 | 3.37E-02 |
| COG5464S                                                                | STM14_0564 | STM0479   | -                       | putative transposase                                               | 2.07 | 4.63E-02 |
| COG3110S                                                                | STM14_1222 | STM1077   | <i>yccT</i>             | hypothetical protein                                               | 3.29 | 4.25E-03 |
| COG0316S                                                                | STM14_1663 | STM1369   | <i>sufA</i>             | iron-sulfur cluster assembly scaffold protein                      | 2.36 | 1.90E-02 |
| COG2719S                                                                | STM14_2181 | STM1804.S | <i>ycgB</i>             | hypothetical protein                                               | 3.06 | 8.82E-04 |
| COG3157S                                                                | STM14_3785 | STM3131   | -                       | putative cytoplasmic protein                                       | 2.59 | 1.62E-02 |
| COG3111S                                                                | STM14_3848 | STM3176   | <i>ygiW</i>             | putative outer membrane protein                                    | 2.03 | 3.66E-02 |
| COG3237S                                                                | STM14_5097 | STM4240   | <i>yjbJ</i>             | putative stress-response protein                                   | 1.97 | 4.14E-02 |

|                     |            |           |             |                                              |      |          |
|---------------------|------------|-----------|-------------|----------------------------------------------|------|----------|
| COG5464S            | STM14_5428 | STM4518   | -           | putative inner membrane protein              | 2.37 | 2.54E-02 |
| <i>Not assigned</i> |            |           |             |                                              |      |          |
|                     | STM14_0135 | STM0114   | <i>leuL</i> | leu operon leader peptide                    | 3.79 | 3.60E-05 |
|                     | STM14_0193 | STM0161   | <i>kdgT</i> | 2-keto-3-deoxygluconate permease             | 2.01 | 4.05E-02 |
|                     | STM14_0224 | -         | -           | hypothetical protein                         | 2.43 | 3.66E-02 |
|                     | STM14_0383 | STM0327   | -           | putative cytoplasmic protein                 | 3.50 | 1.13E-04 |
|                     | STM14_0803 | STM0688   | <i>ybfN</i> | putative lipoprotein                         | 2.04 | 4.32E-02 |
|                     | STM14_958  | -         | -           | hypothetical protein                         | 2.22 | 3.48E-02 |
|                     | STM14_1060 | -         | -           | hypothetical protein                         | 2.53 | 2.47E-02 |
|                     | STM14_1273 | -         | -           | hypothetical protein                         | 2.09 | 3.98E-02 |
|                     | STM14_1275 | STM1121   | <i>ymdF</i> | putative cytoplasmic protein                 | 2.29 | 1.85E-02 |
|                     | STM14_1330 | STM1161.S | <i>bssS</i> | biofilm formation regulatory protein<br>BssS | 2.95 | 1.35E-03 |
|                     | STM14_1535 | STM1272   | <i>yoaG</i> | putative cytoplasmic protein                 | 2.20 | 2.19E-02 |
|                     | STM14_1593 | -         | -           | hypothetical protein                         | 2.14 | 3.08E-02 |
|                     | STM14_1885 | STM1562   | <i>hdeB</i> | acid-resistance protein                      | 2.60 | 5.30E-03 |
|                     | STM14_2680 | -         | -           | hypothetical protein                         | 2.12 | 2.77E-02 |
|                     | STM14_3199 | -         | -           | hypothetical protein                         | 4.19 | 5.99E-06 |
|                     | STM14_3253 | STM2655   | -           | putative cytoplasmic protein                 | 2.24 | 3.43E-02 |
|                     | STM14_3267 | -         | -           | hypothetical protein                         | 2.23 | 2.03E-02 |
|                     | STM14_3376 | -         | -           | hypothetical protein                         | 2.05 | 3.83E-02 |
|                     | STM14_3456 | STM2860   | <i>ygbA</i> | hypothetical protein                         | 5.29 | 7.64E-09 |
|                     | STM14_3630 | STM3007   | <i>ygdR</i> | putative peptide transport protein           | 2.64 | 4.56E-03 |
|                     | STM14_3631 | -         | -           | hypothetical protein                         | 1.94 | 5.00E-02 |
|                     | STM14_3749 | STM3105   | <i>yggM</i> | hypothetical protein                         | 3.15 | 1.02E-03 |
|                     | STM14_3910 | STM3228   | <i>yqjC</i> | hypothetical protein                         | 1.98 | 4.02E-02 |
|                     | STM14_3919 | STM3237   | <i>yhaL</i> | putative cytoplasmic protein                 | 3.52 | 2.84E-03 |
|                     | STM14_4278 | STM3552   | <i>yhhA</i> | hypothetical protein                         | 2.52 | 1.67E-02 |
|                     | STM14_4319 | STM3590   | <i>uspB</i> | universal stress protein UspB                | 2.26 | 2.03E-02 |
|                     | STM14_4446 | STM3688   | -           | putative cytoplasmic protein                 | 3.74 | 4.16E-04 |
|                     | STM14_4697 | STM3900   | <i>ilvL</i> | ilvG operon leader peptide                   | 3.45 | 1.49E-04 |
|                     | STM14_5259 | STM4377   | <i>aidB</i> | isovaleryl CoA dehydrogenase                 | 2.64 | 9.13E-03 |
|                     | STM14_5469 | STM4552   | -           | putative inner membrane protein              | 3.80 | 4.19E-05 |

---

\*Genes assigned to more than one COG

<sup>1</sup> Gene names according to the *E. coli* homologues

**Table S3: Down-regulated genes under acidified NaNO<sub>2</sub> shock in *S. Typhimurium* 14028 WT**

| COG                                                | 14028 identifier | LT2 identifier | Gene name   | Product                                                | log <sub>2</sub> FC | p-value (BH-adjusted) |
|----------------------------------------------------|------------------|----------------|-------------|--------------------------------------------------------|---------------------|-----------------------|
| <i>Energy production &amp; conversion (C)</i>      |                  |                |             |                                                        |                     |                       |
| COG4660C                                           | STM14_1753       | STM1454        | <i>ydgQ</i> | SoxR-reducing system protein RxsE                      | -2.41               | 1.38E-02              |
| COG4659C                                           | STM14_1754       | STM1455        | <i>ydgP</i> | electron transport complex protein RnfG                | -2.09               | 3.37E-02              |
| COG4658C                                           | STM14_1755       | STM1456        | <i>rnfD</i> | electron transport complex protein RnfD                | -2.65               | 8.27E-03              |
| COG4656C                                           | STM14_1756       | STM1457        | -           | electron transport complex protein RnfC                | -2.42               | 1.25E-02              |
| COG2878C                                           | STM14_1757       | STM1458        | <i>ydgM</i> | electron transport complex protein RnfB                | -2.01               | 4.50E-02              |
| COG0282C                                           | STM14_2882       | STM2337        | <i>ackA</i> | acetate kinase                                         | -2.26               | 1.78E-02              |
| COG1143C                                           | STM14_3156       | STM2576        | <i>yfhL</i> | putative ferredoxin                                    | -2.86               | 4.25E-03              |
| COG1032C                                           | STM14_3839       | STM3168        | <i>ygiR</i> | hypothetical protein                                   | -2.65               | 6.69E-03              |
| <i>Carbohydrate transport &amp; metabolism (G)</i> |                  |                |             |                                                        |                     |                       |
| COG0524G                                           | STM14_0578       | STM0491        | <i>gsk</i>  | inosine-guanosine kinase                               | -2.79               | 3.58E-03              |
| COG2814G                                           | STM14_1016       | STM0866        | <i>mdfA</i> | multidrug translocase                                  | -2.00               | 4.92E-02              |
| COG2814G                                           | STM14_1094       | STM0968        | <i>ycaD</i> | MFS family transporter                                 | -4.06               | 6.79E-05              |
| COG0574G                                           | STM14_1639       | STM1349        | <i>pps</i>  | phosphoenolpyruvate synthase                           | -2.35               | 1.26E-02              |
| COG0483G                                           | STM14_3124       | STM2546        | <i>suhB</i> | inositol monophosphatase                               | -3.34               | 2.81E-04              |
| COG2814G                                           | STM14_4586       | STM3798        | <i>emrD</i> | multidrug resistance protein D                         | -2.05               | 3.89E-02              |
| <i>Amino acid transport &amp; metabolism (E)</i>   |                  |                |             |                                                        |                     |                       |
| *COG0505EF                                         | STM14_0077       | STM0066        | <i>carA</i> | carbamoyl phosphate synthase small subunit             | -4.78               | 1.82E-06              |
| COG1586E                                           | STM14_0197       | STM0165        | <i>speD</i> | S-adenosylmethionine decarboxylase                     | -2.52               | 8.09E-03              |
| COG1177E                                           | STM14_1398       | STM1223        | <i>potC</i> | spermidine/putrescine ABC transporter membrane protein | -2.24               | 2.03E-02              |
| COG1176E                                           | STM14_1402       | STM1225        | <i>potB</i> | spermidine/putrescine ABC transporter membrane protein | -3.27               | 5.16E-04              |
| COG3842E                                           | STM14_1403       | STM1226        | <i>potA</i> | putrescine/spermidine ABC transporter ATPase           | -2.44               | 1.08E-02              |
| COG1605E                                           | STM14_1531       | STM1269        | -           | chorismate mutase                                      | -2.79               | 4.10E-03              |
| *COG0252EJ                                         | STM14_1571       | STM1294        | <i>ansA</i> | asparaginase                                           | -2.15               | 3.14E-02              |
| *COG0462FE                                         | STM14_2153       | STM1780        | <i>prsA</i> | ribose-phosphate pyrophosphokinase                     | -3.28               | 3.34E-04              |
| COG0814E                                           | STM14_2355       | STM1937        | <i>tyrP</i> | tyrosine-specific transport protein                    | -2.70               | 9.13E-03              |
| COG0531E                                           | STM14_2560       | STM2068        | <i>yeeF</i> | putative amino acid transport protein                  | -3.47               | 1.42E-04              |
| COG0436E                                           | STM14_2874       | STM2331        | <i>yfbQ</i> | aminotransferase AlaT                                  | -2.12               | 3.08E-02              |

|                                                  |            |           |             |                                                                                           |       |          |
|--------------------------------------------------|------------|-----------|-------------|-------------------------------------------------------------------------------------------|-------|----------|
| COG0814E                                         | STM14_3650 | STM3022   | -           | putative transport protein                                                                | -2.18 | 2.55E-02 |
| COG1982E                                         | STM14_3761 | STM3114   | <i>speC</i> | ornithine decarboxylase                                                                   | -2.20 | 2.90E-02 |
| COG0814E                                         | STM14_4369 | STM3625   | <i>yhjV</i> | putative transport protein                                                                | -2.43 | 1.92E-02 |
| COG0174E                                         | STM14_4820 | STM4007   | <i>glnA</i> | glutamine synthetase                                                                      | -2.02 | 3.66E-02 |
| <i>Nucleotide transport &amp; metabolism (F)</i> |            |           |             |                                                                                           |       |          |
| *COG0505EF                                       | STM14_0077 | STM0066   | <i>carA</i> | carbamoyl phosphate synthase small subunit                                                | -4.78 | 1.82E-06 |
| COG1051F                                         | STM14_0163 | STM0137   | <i>mutT</i> | nucleoside triphosphate pyrophosphohydrolase                                              | -2.26 | 3.15E-02 |
| COG0634F                                         | STM14_0202 | STM0170   | <i>hpt</i>  | hypoxanthine-guanine phosphoribosyltransferase                                            | -2.46 | 9.13E-03 |
| COG0528F                                         | STM14_0259 | STM0218   | <i>pyrH</i> | uridylylate kinase                                                                        | -2.14 | 2.64E-02 |
| COG0503F                                         | STM14_0373 | STM0317   | <i>gpt</i>  | xanthine-guanine phosphoribosyltransferase                                                | -3.17 | 5.64E-04 |
| COG0563F                                         | STM14_0574 | STM0488   | <i>adk</i>  | adenylylate kinase                                                                        | -2.43 | 1.01E-02 |
| COG0167F                                         | STM14_1200 | STM1058   | <i>pyrD</i> | dihydroorotate dehydrogenase 2                                                            | -2.47 | 9.70E-03 |
| COG0418F                                         | STM14_1332 | STM1163   | <i>pyrC</i> | dihydroorotase                                                                            | -2.22 | 2.49E-02 |
| COG0015F                                         | STM14_1410 | STM1232   | <i>purB</i> | adenylosuccinate lyase                                                                    | -3.16 | 6.27E-04 |
| COG0284F                                         | STM14_2064 | STM1707   | <i>pyrF</i> | orotidine 5'-phosphate decarboxylase                                                      | -2.94 | 2.40E-03 |
| *COG0462FE                                       | STM14_2153 | STM1780   | <i>prsA</i> | ribose-phosphate pyrophosphokinase                                                        | -3.28 | 3.34E-04 |
| COG0572F                                         | STM14_2618 | STM2122   | <i>udk</i>  | uridine kinase                                                                            | -2.68 | 4.56E-03 |
| COG0034F                                         | STM14_2909 | STM2362   | <i>purF</i> | amidophosphoribosyltransferase                                                            | -2.06 | 3.46E-02 |
| COG2233F                                         | STM14_3061 | STM2497   | <i>uraA</i> | uracil transporter                                                                        | -3.94 | 3.88E-05 |
| COG0150F                                         | STM14_3064 | STM2499.S | <i>purM</i> | phosphoribosylaminoimidazole synthetase                                                   | -2.13 | 3.15E-02 |
| COG0519F                                         | STM14_3075 | STM2510   | <i>guaA</i> | bifunctional GMP synthase/glutamine amidotransferase protein                              | -2.26 | 1.83E-02 |
| COG0516F                                         | STM14_3076 | STM2511   | <i>guaB</i> | inositol-5-monophosphate dehydrogenase                                                    | -3.80 | 4.19E-05 |
| COG0207F                                         | STM14_3617 | STM3001   | <i>thyA</i> | thymidylate synthase                                                                      | -1.96 | 4.96E-02 |
| COG1457F                                         | STM14_4024 | STM3333   | <i>codB</i> | cytosine permease                                                                         | -2.21 | 3.74E-02 |
| COG0461F                                         | STM14_4495 | STM3733   | <i>pyrE</i> | orotate phosphoribosyltransferase                                                         | -3.33 | 4.43E-04 |
| COG0138F                                         | STM14_5017 | STM4176   | <i>purH</i> | bifunctional phosphoribosylaminoimidazolecarboxamide formyltransferase/IMP cyclohydrolase | -2.63 | 9.13E-03 |
| <i>Coenzyme transport &amp; metabolism (H)</i>   |            |           |             |                                                                                           |       |          |
| COG0262H                                         | STM14_0106 | STM0087   | <i>folA</i> | dihydrofolate reductase                                                                   | -2.99 | 3.21E-03 |
| COG0413H                                         | STM14_0216 | STM0182   | <i>panB</i> | 3-methyl-2-oxobutanoate hydroxymethyltransferase                                          | -3.18 | 2.97E-03 |



|                                                                           |            |           |             |                                                                         |       |          |
|---------------------------------------------------------------------------|------------|-----------|-------------|-------------------------------------------------------------------------|-------|----------|
| COG0301H                                                                  | STM14_0503 | STM0425   | <i>thiI</i> | thiamine biosynthesis protein ThiI                                      | -1.96 | 4.39E-02 |
| COG2240H                                                                  | STM14_1748 | STM1450   | <i>pdxY</i> | pyridoxamine kinase                                                     | -2.11 | 2.90E-02 |
| COG2226H                                                                  | STM14_2217 | STM1835   | <i>rrmA</i> | 23S rRNA methyltransferase A                                            | -2.81 | 6.11E-03 |
| COG2227H                                                                  | STM14_2318 | STM1906   | <i>yecP</i> | hypothetical protein                                                    | -2.13 | 3.15E-02 |
| COG1477H                                                                  | STM14_2796 | STM2266   | <i>apbE</i> | thiamine biosynthesis lipoprotein<br>ApbE                               | -2.00 | 4.39E-02 |
| COG0720H                                                                  | STM14_3554 | STM2949   | <i>ptpS</i> | putative 6-pyruvoyl<br>tetrahydrobiopterin synthase                     | -4.04 | 1.84E-04 |
| COG1072H                                                                  | STM14_4975 | STM4139   | <i>coaA</i> | pantothenate kinase                                                     | -2.08 | 3.15E-02 |
| <i>Lipid transport &amp; metabolism (I)</i>                               |            |           |             |                                                                         |       |          |
| COG0764I                                                                  | STM14_1211 | STM1067   | <i>fabA</i> | 3-hydroxydecanoyl-ACP dehydratase                                       | -2.71 | 3.86E-03 |
| COG1607I                                                                  | STM14_2099 | STM1736   | <i>yciA</i> | acyl-CoA thioester hydrolase                                            | -2.58 | 1.57E-02 |
| COG1835I                                                                  | STM14_2758 | STM2232   | <i>oafA</i> | O-antigen acetylase                                                     | -3.04 | 8.65E-04 |
| <i>Inorganic ion transport &amp; metabolism (P)</i>                       |            |           |             |                                                                         |       |          |
| COG0306P                                                                  | STM14_4318 | STM3589   | <i>pitA</i> | low-affinity phosphate transporter                                      | -2.41 | 1.13E-02 |
| <i>Secondary metabolites biosynthesis, transport &amp; catabolism (Q)</i> |            |           |             |                                                                         |       |          |
| COG1021Q                                                                  | STM14_0694 | STM0596   | <i>entE</i> | enterobactin synthase subunit E                                         | -2.02 | 4.06E-02 |
| <i>Translation, ribosomal structure &amp; biogenesis (J)</i>              |            |           |             |                                                                         |       |          |
| COG0268J                                                                  | STM14_0052 | STM0043   | <i>rpsT</i> | 30S ribosomal protein S20                                               | -2.54 | 6.69E-03 |
| COG0809J                                                                  | STM14_0478 | STM0404   | <i>queA</i> | S-adenosylmethionine--tRNA<br>ribosyltransferase-isomerase              | -2.31 | 1.95E-02 |
| *COG0513LKJ                                                               | STM14_0951 | STM0820   | <i>rhIE</i> | ATP-dependent RNA helicase RhIE                                         | -3.54 | 2.75E-04 |
| COG0621J                                                                  | STM14_0996 | STM0852   | <i>yliG</i> | putative FeS oxidoreductase                                             | -3.90 | 4.19E-05 |
| COG0361J                                                                  | STM14_1075 | STM0953   | <i>infA</i> | translation initiation factor IF-1                                      | -3.55 | 9.21E-05 |
| COG0539J                                                                  | STM14_1110 | STM0981   | <i>rpsA</i> | 30S ribosomal protein S1                                                | -2.15 | 2.45E-02 |
| COG0482J                                                                  | STM14_1412 | STM1234.S | <i>trmU</i> | tRNA (5-methyl aminomethyl-2-<br>thiouridylate)-methyltransferase       | -1.96 | 4.63E-02 |
| *COG0252EJ                                                                | STM14_1571 | STM1294   | <i>ansA</i> | asparaginase                                                            | -2.15 | 3.14E-02 |
| COG0016J                                                                  | STM14_1624 | STM1337   | <i>pheS</i> | phenylalanyl-tRNA synthetase<br>subunit alpha                           | -2.73 | 3.93E-03 |
| *COG0513LKJ                                                               | STM14_2001 | STM1655   | <i>dbpA</i> | ATP-dependent RNA helicase DbpA                                         | -2.11 | 4.28E-02 |
| COG0023J                                                                  | STM14_2063 | STM1706   | <i>yciH</i> | translation initiation factor Sui1                                      | -3.04 | 2.40E-03 |
| COG1187J                                                                  | STM14_2082 | STM1719   | <i>yciL</i> | 23S rRNA pseudouridylate synthase                                       | -2.80 | 4.25E-03 |
| <b>B</b>                                                                  |            |           |             |                                                                         |       |          |
| COG0144J                                                                  | STM14_2237 | STM1850   | <i>yebU</i> | rRNA (cytosine-C(5)-)-<br>methyltransferase RsmF                        | -2.66 | 9.13E-03 |
| COG0018J                                                                  | STM14_2322 | STM1909   | <i>argS</i> | arginyl-tRNA synthetase                                                 | -2.27 | 1.78E-02 |
| COG0231J                                                                  | STM14_2733 | STM2211.S | <i>yeiP</i> | elongation factor P                                                     | -2.36 | 1.31E-02 |
| COG2890J                                                                  | STM14_2934 | STM2385   | <i>yfcB</i> | N5-glutamine S-adenosyl-L-<br>methionine-dependent<br>methyltransferase | -2.21 | 2.21E-02 |

|             |            |           |             |                                             |       |          |
|-------------|------------|-----------|-------------|---------------------------------------------|-------|----------|
| COG0336J    | STM14_3277 | STM2674   | <i>trmD</i> | tRNA (guanine-N(1))-methyltransferase       | -2.35 | 1.25E-02 |
| COG0806J    | STM14_3278 | STM2675   | <i>rimM</i> | 16S rRNA-processing protein                 | -2.52 | 7.25E-03 |
| COG0828J    | STM14_3886 | STM3209   | <i>rpsU</i> | 30S ribosomal protein S21                   | -4.78 | 1.11E-07 |
| COG2813J    | STM14_3899 | STM3220   | <i>ygjO</i> | putative methyltransferase                  | -2.24 | 2.03E-02 |
| *COG0513LKJ | STM14_3962 | STM3280.S | <i>deaD</i> | ATP-dependent RNA helicase DeaD             | -2.49 | 9.58E-03 |
| COG0184J    | STM14_3966 | STM3283   | <i>rpsO</i> | 30S ribosomal protein S15                   | -2.60 | 5.31E-03 |
| COG0211J    | STM14_3990 | STM3303   | <i>rpmA</i> | 50S ribosomal protein L27                   | -2.16 | 2.32E-02 |
| COG0261J    | STM14_3991 | STM3304   | <i>rplU</i> | 50S ribosomal protein L21                   | -2.64 | 4.56E-03 |
| COG0102J    | STM14_4037 | STM3345   | <i>rplM</i> | 50S ribosomal protein L13                   | -2.43 | 9.46E-03 |
| COG0042J    | STM14_4082 | STM3384   | <i>yhdG</i> | tRNA-dihydrouridine synthase B              | -3.18 | 4.68E-04 |
| COG0203J    | STM14_4117 | STM3414   | <i>rplQ</i> | 50S ribosomal protein L17                   | -2.14 | 2.51E-02 |
| COG0522J    | STM14_4119 | STM3416   | <i>rpsD</i> | 30S ribosomal protein S4                    | -2.33 | 1.31E-02 |
| COG0100J    | STM14_4120 | STM3417   | <i>rpsK</i> | 30S ribosomal protein S11                   | -2.06 | 3.24E-02 |
| COG1841J    | STM14_4125 | STM3422   | <i>rpmD</i> | 50S ribosomal protein L30                   | -1.97 | 4.07E-02 |
| COG0098J    | STM14_4126 | STM3423   | <i>rpsE</i> | 30S ribosomal protein S5                    | -2.27 | 1.67E-02 |
| COG0256J    | STM14_4127 | STM3424   | <i>rplR</i> | 50S ribosomal protein L18                   | -2.32 | 1.36E-02 |
| COG0097J    | STM14_4128 | STM3425   | <i>rplF</i> | 50S ribosomal protein L6                    | -2.55 | 6.41E-03 |
| COG0096J    | STM14_4129 | STM3426   | <i>rpsH</i> | 30S ribosomal protein S8                    | -3.32 | 2.75E-04 |
| COG0199J    | STM14_4130 | STM3427.S | <i>rpsN</i> | 30S ribosomal protein S14                   | -3.19 | 4.43E-04 |
| COG0094J    | STM14_4131 | STM3428   | <i>rplE</i> | 50S ribosomal protein L5                    | -2.66 | 4.25E-03 |
| COG0198J    | STM14_4132 | STM3429   | <i>rplX</i> | 50S ribosomal protein L24                   | -2.46 | 9.13E-03 |
| COG0185J    | STM14_4139 | STM3436   | <i>rpsS</i> | 30S ribosomal protein S19                   | -2.35 | 1.26E-02 |
| COG0090J    | STM14_4140 | STM3437   | <i>rplB</i> | 50S ribosomal protein L2                    | -2.01 | 3.66E-02 |
| COG0089J    | STM14_4141 | STM3438   | <i>rplW</i> | 50S ribosomal protein L23                   | -2.45 | 9.13E-03 |
| COG0088J    | STM14_4142 | STM3439   | <i>rplD</i> | 50S ribosomal protein L4                    | -2.35 | 1.25E-02 |
| COG0087J    | STM14_4143 | STM3440   | <i>rplC</i> | 50S ribosomal protein L3                    | -2.41 | 1.01E-02 |
| COG0051J    | STM14_4144 | STM3441   | <i>rpsJ</i> | 30S ribosomal protein S10                   | -3.08 | 6.95E-04 |
| COG0049J    | STM14_4151 | STM3447   | <i>rpsG</i> | 30S ribosomal protein S7                    | -2.49 | 8.23E-03 |
| COG0267J    | STM14_4489 | STM3727   | <i>rpmG</i> | 50S ribosomal protein L33                   | -3.09 | 6.80E-04 |
| COG0227J    | STM14_4490 | STM3728   | <i>rpmB</i> | 50S ribosomal protein L28                   | -2.38 | 1.13E-02 |
| COG0689J    | STM14_4496 | STM3734   | <i>rph</i>  | ribonuclease PH                             | -2.86 | 2.40E-03 |
| COG0230J    | STM14_4634 | STM3839   | <i>rpmH</i> | 50S ribosomal protein L34                   | -2.33 | 1.31E-02 |
| COG0594J    | STM14_4635 | STM3840   | <i>rnpA</i> | ribonuclease P                              | -3.52 | 1.08E-04 |
| COG0080J    | STM14_4986 | STM4149   | <i>rplK</i> | 50S ribosomal protein L11                   | -2.15 | 2.45E-02 |
| COG0360J    | STM14_5275 | STM4391   | <i>rpsF</i> | 30S ribosomal protein S6                    | -3.38 | 2.16E-04 |
| COG0238J    | STM14_5277 | STM4393   | <i>rpsR</i> | 30S ribosomal protein S18                   | -3.66 | 5.61E-05 |
| COG2813J    | STM14_5473 | STM4556   | <i>rsmC</i> | 16S ribosomal RNA m2G1207 methyltransferase | -2.50 | 9.74E-03 |
| COG4108J    | STM14_5478 | STM4560   | <i>prfC</i> | peptide chain release factor 3              | -2.43 | 1.06E-02 |

Transcription (K)

|             |            |           |             |                                            |       |          |
|-------------|------------|-----------|-------------|--------------------------------------------|-------|----------|
| *COG0553KL  | STM14_0116 | STM0096   | <i>hepA</i> | ATP-dependent helicase HepA                | -2.09 | 3.46E-02 |
| COG1278K    | STM14_0732 | STM0629   | <i>cspE</i> | cold shock protein CspE                    | -3.42 | 1.65E-04 |
| *COG0513LKJ | STM14_0951 | STM0820   | <i>rhIE</i> | ATP-dependent RNA helicase RhIE            | -3.54 | 2.75E-04 |
| COG1609K    | STM14_1727 | STM1430   | <i>purR</i> | DNA-binding transcriptional repressor PurR | -2.33 | 1.69E-02 |
| *COG0513LKJ | STM14_2001 | STM1655   | <i>dbpA</i> | ATP-dependent RNA helicase DbpA            | -2.11 | 4.28E-02 |
| COG4776K    | STM14_2056 | STM1702   | <i>rnb</i>  | exoribonuclease II                         | -2.25 | 1.89E-02 |
| COG1414K    | STM14_3742 | STM3098   | -           | putative transcriptional regulator         | -2.07 | 4.85E-02 |
| *COG0513LKJ | STM14_3962 | STM3280.S | <i>deaD</i> | ATP-dependent RNA helicase DeaD            | -2.49 | 9.58E-03 |
| *COG2901KL  | STM14_4083 | STM3385   | <i>fis</i>  | DNA-binding protein Fis                    | -3.85 | 2.71E-05 |
| COG0202K    | STM14_4118 | STM3415   | <i>rpoA</i> | DNA-directed RNA polymerase subunit alpha  | -1.98 | 4.03E-02 |

#### *Replication, recombination & repair (L)*

|             |            |           |             |                                      |       |          |
|-------------|------------|-----------|-------------|--------------------------------------|-------|----------|
| *COG0553KL  | STM14_0116 | STM0096   | <i>hepA</i> | ATP-dependent helicase HepA          | -2.09 | 3.46E-02 |
| *COG0513LKJ | STM14_0951 | STM0820   | <i>rhIE</i> | ATP-dependent RNA helicase RhIE      | -3.54 | 2.75E-04 |
| COG0116L    | STM14_1204 | STM1061   | <i>ycbY</i> | 23S rRNA m(2)G2445 methyltransferase | -2.48 | 1.01E-02 |
| COG0188L    | STM14_2804 | STM2272   | <i>gyrA</i> | DNA gyrase subunit A                 | -2.04 | 3.46E-02 |
| *COG2901KL  | STM14_4083 | STM3385   | <i>fis</i>  | DNA-binding protein Fis              | -3.85 | 2.71E-05 |
| COG3344L    | STM14_4641 | STM3846.s | -           | putative reverse transcriptase       | -2.47 | 9.13E-03 |
| COG2965L    | STM14_5276 | STM4392   | <i>priB</i> | primosomal replication protein N     | -2.88 | 1.83E-03 |
| *COG0513LKJ | STM14_2001 | STM1655   | <i>dbpA</i> | ATP-dependent RNA helicase DbpA      | -2.11 | 4.28E-02 |
| *COG0513LKJ | STM14_3962 | STM3280.S | <i>deaD</i> | ATP-dependent RNA helicase DeaD      | -2.49 | 9.58E-03 |

#### *Signal transduction mechanisms (T)*

|          |            |         |             |                                         |       |          |
|----------|------------|---------|-------------|-----------------------------------------|-------|----------|
| COG3109T | STM14_2233 | STM1846 | <i>proQ</i> | putative solute/DNA competence effector | -2.47 | 9.13E-03 |
|----------|------------|---------|-------------|-----------------------------------------|-------|----------|

#### *Cell wall/membrane/envelope biogenesis (M)*

|          |            |         |             |                                     |       |          |
|----------|------------|---------|-------------|-------------------------------------|-------|----------|
| COG0768M | STM14_0148 | STM0122 | <i>ftsI</i> | division specific transpeptidase    | -2.22 | 1.95E-02 |
| COG0463M | STM14_0651 | STM0558 | <i>yfdH</i> | putative glycosyltransferase        | -4.37 | 3.91E-05 |
| COG3137M | STM14_1611 | STM1327 | <i>ydiY</i> | putative outer membrane protein     | -3.74 | 4.75E-05 |
| COG0768M | STM14_2324 | STM1910 | -           | putative penicillin-binding protein | -2.53 | 1.06E-02 |
| COG4623M | STM14_3147 | STM2567 | <i>yfhD</i> | putative transglycosylase           | -2.34 | 1.38E-02 |
| COG0463M | STM14_5055 | STM4205 | -           | putative phage glycosyltransferase  | -3.24 | 4.46E-04 |
| COG1346M | STM14_5138 | STM4272 | -           | putative inner membrane protein     | -2.38 | 1.57E-02 |

#### *Cell motility (N)*

|            |            |         |             |                                                       |       |          |
|------------|------------|---------|-------------|-------------------------------------------------------|-------|----------|
| *COG1261NO | STM14_1343 | STM1173 | <i>flgA</i> | flagellar basal body P-ring biosynthesis protein FlgA | -2.77 | 5.12E-03 |
| COG1815N   | STM14_1345 | STM1174 | <i>flgB</i> | flagellar basal body rod protein FlgB                 | -2.02 | 3.72E-02 |
| COG2063N   | STM14_1351 | STM1180 | <i>flgH</i> | flagellar basal body L-ring protein                   | -2.78 | 4.56E-03 |
| *COG1298NU | STM14_2327 | STM1913 | <i>flhA</i> | flagellar biosynthesis protein FlhA                   | -2.13 | 3.08E-02 |
| *COG1377NU | STM14_2328 | STM1914 | <i>flhB</i> | flagellar biosynthesis protein FlhB                   | -2.60 | 9.13E-03 |

|                                                                            |            |           |             |                                                               |       |          |
|----------------------------------------------------------------------------|------------|-----------|-------------|---------------------------------------------------------------|-------|----------|
| *COG1677NU                                                                 | STM14_2388 | STM1968   | <i>fliE</i> | flagellar hook-basal body protein<br>FliE                     | -2.89 | 5.93E-03 |
| *COG1766NU                                                                 | STM14_2390 | STM1969   | <i>fliF</i> | flagellar MS-ring protein                                     | -2.36 | 1.26E-02 |
| COG1536N                                                                   | STM14_2391 | STM1970   | <i>fliG</i> | flagellar motor switch protein G                              | -2.02 | 3.72E-02 |
| <i>Intracellular trafficking, secretion, &amp; vesicular transport (U)</i> |            |           |             |                                                               |       |          |
| COG0848U                                                                   | STM14_0868 | STM0746   | <i>tolR</i> | colicin uptake protein TolR                                   | -2.03 | 3.66E-02 |
| *COG1298NU                                                                 | STM14_2327 | STM1913   | <i>flhA</i> | flagellar biosynthesis protein FlhA                           | -2.13 | 3.08E-02 |
| *COG1377NU                                                                 | STM14_2328 | STM1914   | <i>flhB</i> | flagellar biosynthesis protein FlhB                           | -2.60 | 9.13E-03 |
| *COG1677NU                                                                 | STM14_2388 | STM1968   | <i>fliE</i> | flagellar hook-basal body protein<br>FliE                     | -2.89 | 5.93E-03 |
| *COG1766NU                                                                 | STM14_2390 | STM1969   | <i>fliF</i> | flagellar MS-ring protein                                     | -2.36 | 1.26E-02 |
| COG1314U                                                                   | STM14_3976 | STM3293   | <i>secG</i> | preprotein translocase subunit SecG                           | -1.98 | 4.03E-02 |
| COG0706U                                                                   | STM14_4637 | STM3842   | <i>yidC</i> | putative inner membrane protein<br>translocase component YidC | -2.78 | 2.75E-03 |
| COG0805U                                                                   | STM14_4781 | STM3975   | <i>tatC</i> | TatABCE protein translocation<br>system subunit               | -2.05 | 3.46E-02 |
| COG0690U                                                                   | STM14_4984 | STM4147   | <i>secE</i> | preprotein translocase subunit SecE                           | -2.14 | 2.77E-02 |
| <i>Posttranslational modification, protein turnover, chaperones (O)</i>    |            |           |             |                                                               |       |          |
| COG1067O                                                                   | STM14_1212 | STM1068   | <i>lonH</i> | putative protease                                             | -2.26 | 1.89E-02 |
| *COG1261NO                                                                 | STM14_1343 | STM1173   | <i>flgA</i> | flagellar basal body P-ring<br>biosynthesis protein FlgA      | -2.77 | 5.12E-03 |
| COG1214O                                                                   | STM14_2202 | STM1820   | <i>yeaZ</i> | putative molecular chaperone                                  | -2.43 | 1.87E-02 |
| COG0826O                                                                   | STM14_2634 | STM2136   | <i>yegQ</i> | putative protease                                             | -3.38 | 5.08E-04 |
| <i>General function prediction only (R)</i>                                |            |           |             |                                                               |       |          |
| COG1054R                                                                   | STM14_1324 | STM1156   | <i>yceA</i> | hypothetical protein                                          | -2.65 | 4.93E-03 |
| COG2915R                                                                   | STM14_1411 | STM1233   | <i>ycfC</i> | hypothetical protein                                          | -2.54 | 8.96E-03 |
| COG4106R                                                                   | STM14_2317 | STM1905   | <i>yecO</i> | putative SAM-dependent<br>methyltransferase                   | -2.45 | 1.08E-02 |
| COG1160R                                                                   | STM14_3089 | STM2519   | <i>engA</i> | GTP-binding protein EngA                                      | -2.38 | 1.23E-02 |
| COG0820R                                                                   | STM14_3097 | STM2525   | <i>yfgB</i> | hypothetical protein                                          | -2.62 | 5.19E-03 |
| COG1159R                                                                   | STM14_3160 | STM2580   | <i>era</i>  | GTP-binding protein Era                                       | -2.33 | 1.38E-02 |
| COG0536R                                                                   | STM14_3988 | STM3301   | <i>obgE</i> | GTPase ObgE                                                   | -2.47 | 9.46E-03 |
| COG2252R                                                                   | STM14_4646 | STM3851.S | <i>yieG</i> | putative xanthine/uracil permease<br>family protein           | -2.07 | 4.03E-02 |
| COG2252R                                                                   | STM14_5133 | STM4268   | <i>yjcD</i> | hypothetical protein                                          | -2.15 | 4.39E-02 |
| COG1380R                                                                   | STM14_5137 | STM4271   | -           | LrgA family protein                                           | -2.14 | 3.44E-02 |
| <i>Function unknown (S)</i>                                                |            |           |             |                                                               |       |          |
| COG1576S                                                                   | STM14_0749 | STM0641   | <i>ybeA</i> | SPOUT methyltransferase<br>superfamily protein                | -2.15 | 3.74E-02 |
| COG0799S                                                                   | STM14_0750 | STM0642   | <i>ybeB</i> | hypothetical protein                                          | -2.64 | 9.73E-03 |
| COG1376S                                                                   | STM14_977  | STM0837   | <i>ybiS</i> | hypothetical protein                                          | -2.82 | 2.64E-03 |

|                     |            |           |               |                                          |       |          |
|---------------------|------------|-----------|---------------|------------------------------------------|-------|----------|
| COG1944S            | STM14_1101 | STM0975   | <i>ycaO</i>   | putative cytoplasmic protein             | -3.12 | 7.68E-04 |
| COG3781S            | STM14_1845 | STM1527   | -             | putative inner membrane protein          | -2.64 | 6.09E-03 |
| COG2983S            | STM14_2190 | STM1811   | <i>ycgN</i>   | hypothetical protein                     | -2.18 | 3.15E-02 |
| COG3101S            | STM14_2930 | STM2381   | <i>yfcM</i>   | putative cytoplasmic protein             | -1.92 | 4.97E-02 |
| COG2990S            | STM14_3352 | STM2781   | <i>virK</i>   | virulence protein                        | -3.38 | 2.76E-04 |
| COG2862S            | STM14_3818 | STM3153   | <i>yqhA</i>   | hypothetical protein                     | -2.21 | 2.52E-02 |
| COG3036S            | STM14_4114 | STM3411   | -             | putative cytoplasmic protein             | -1.96 | 4.85E-02 |
| COG2860S            | STM14_4502 | STM3738   | -             | putative inner membrane protein          | -2.61 | 7.47E-03 |
| COG0759S            | STM14_4636 | STM3841   | -             | hypothetical protein                     | -3.31 | 4.43E-04 |
| COG3085S            | STM14_4694 | STM3898   | <i>yifE</i>   | hypothetical protein                     | -1.92 | 4.77E-02 |
| COG2246S            | STM14_5056 | STM4206   | -             | putative phage glucose translocase       | -2.33 | 2.32E-02 |
| COG3242S            | STM14_5246 | STM4365   | <i>yjeT</i>   | putative inner membrane protein          | -2.07 | 4.04E-02 |
| <i>Not assigned</i> |            |           |               |                                          |       |          |
|                     | STM14_0296 | -         | -             | hypothetical protein                     | -5.68 | 2.21E-09 |
|                     | STM14_0731 | STM0628   | <i>pagP</i>   | palmitoyl transferase for Lipid A        | -2.90 | 3.53E-03 |
|                     | STM14_1076 | STM0954   | -             | putative inner membrane protein          | -3.21 | 4.40E-04 |
|                     | STM14_1493 | STM1242   | <i>envE</i>   | putative envelope protein                | -3.49 | 8.10E-04 |
|                     | STM14_1760 | STM1461.S | <i>ydgT</i>   | oriC-binding nucleoid-associated protein | -2.14 | 2.89E-02 |
|                     | STM14_1982 | STM1638   | -             | putative SAM-dependent methyltransferase | -2.25 | 2.72E-02 |
|                     | STM14_2366 | -         | -             | putative inner membrane protein          | -2.57 | 6.92E-03 |
|                     | STM14_2367 | STM1949   | <i>yecF</i>   | hypothetical protein                     | -1.97 | 4.05E-02 |
|                     | STM14_2489 | STM2005   | -             | putative endoprotease                    | -4.86 | 5.54E-06 |
|                     | STM14_2562 | -         | -             | hypothetical protein                     | -4.22 | 5.54E-06 |
|                     | STM14_2881 | -         | -             | hypothetical protein                     | -2.14 | 2.78E-02 |
|                     | STM14_3146 | STM2566   | -             | hypothetical protein                     | -2.55 | 1.83E-02 |
|                     | STM14_3353 | -         | -             | hypothetical protein                     | -2.65 | 5.55E-03 |
| COG5653             | STM14_3354 | STM2782   | <i>mig-14</i> | putative transcriptional activator       | -2.25 | 1.85E-02 |
|                     | STM14_3467 | STM2868   | <i>orgC</i>   | putative cytoplasmic protein             | -2.30 | 2.03E-02 |
|                     | STM14_3468 | STM2869   | <i>orgB</i>   | needle complex export protein            | -2.70 | 4.25E-03 |
|                     | STM14_3732 | STM3089   | <i>yqgD</i>   | putative inner membrane protein          | -2.22 | 2.10E-02 |
|                     | STM14_4633 | -         | -             | hypothetical protein                     | -2.39 | 2.11E-02 |
|                     | STM14_4640 | STM3845   | -             | putative inner membrane protein          | -2.10 | 2.95E-02 |
|                     | STM14_4797 | -         | -             | hypothetical protein                     | -5.59 | 2.69E-09 |
|                     | STM14_4898 | -         | -             | hypothetical protein                     | -2.25 | 3.06E-02 |
|                     | STM14_4970 | -         | -             | hypothetical protein                     | -5.49 | 3.97E-09 |
|                     | STM14_5054 | STM4204   | -             | putative inner membrane protein          | -2.85 | 2.50E-03 |
|                     | STM14_5196 | -         | -             | hypothetical protein                     | -3.02 | 1.66E-03 |

---

\*Genes assigned to more than one COG

**Table S4: Up-regulated genes under acidified NaNO<sub>2</sub> adaptation in *S. Typhimurium* 14028 WT**

| COG                                                 | 14028 identifier | LT2 identifier | Gene name   | Product                                                    | log <sub>2</sub> FC | p-value (BH-adjusted) |
|-----------------------------------------------------|------------------|----------------|-------------|------------------------------------------------------------|---------------------|-----------------------|
| <i>Energy production &amp; conversion (C)</i>       |                  |                |             |                                                            |                     |                       |
| COG1151C                                            | STM14_1052       | STM0937        | <i>hcp</i>  | hydroxylamine reductase                                    | 3.38                | 2.74E-04              |
| COG1018C                                            | STM14_3135       | STM2556        | <i>hmpA</i> | nitric oxide dioxygenase                                   | 4.53                | 1.62E-06              |
| <i>Carbohydrate transport &amp; metabolism (G)</i>  |                  |                |             |                                                            |                     |                       |
| COG1129G                                            | STM14_4899       | STM4074        | <i>ego</i>  | putative ABC-type aldose transport system ATPase component | 2.89                | 2.88E-03              |
| COG1172G                                            | STM14_4900       | STM4075        | <i>ydeY</i> | putative sugar transport protein                           | 2.74                | 5.86E-03              |
| COG1172G                                            | STM14_4901       | STM4076        | <i>ydeZ</i> | putative sugar transport protein                           | 2.92                | 2.61E-03              |
| COG1879G                                            | STM14_4902       | STM4077        | <i>yneA</i> | putative sugar transport protein                           | 2.34                | 2.42E-02              |
| COG1830G                                            | STM14_4903       | STM4078        | <i>yneB</i> | aldolase                                                   | 2.15                | 4.66E-02              |
| <i>Amino acid transport &amp; metabolism (E)</i>    |                  |                |             |                                                            |                     |                       |
| COG0531E                                            | STM14_0817       | STM0700        | <i>potE</i> | putrescine transporter                                     | 3.40                | 2.60E-04              |
| COG1982E                                            | STM14_0818       | STM0701        | <i>speF</i> | ornithine decarboxylase                                    | 3.23                | 5.40E-04              |
| COG2502E                                            | STM14_4674       | STM3877        | <i>asnA</i> | asparagine synthetase AsnA                                 | 2.15                | 4.66E-02              |
| COG0531E                                            | STM14_5166       | STM4294        | <i>yjdE</i> | arginine:agmatin antiporter                                | 3.59                | 1.97E-04              |
| COG1982E                                            | STM14_5169       | STM4296        | <i>adi</i>  | catabolic arginine decarboxylase                           | 2.81                | 4.01E-03              |
| COG0078E                                            | STM14_5358       | STM4465        | -           | ornithine carbamoyltransferase                             | 3.56                | 1.97E-04              |
| COG0549E                                            | STM14_5360       | STM4466        | -           | carbamate kinase                                           | 2.89                | 4.80E-03              |
| COG2235E                                            | STM14_5361       | STM4467        | -           | arginine deiminase                                         | 2.72                | 5.86E-03              |
| <i>Coenzyme transport &amp; metabolism (H)</i>      |                  |                |             |                                                            |                     |                       |
| *COG1120PH                                          | STM14_0688       | STM0590        | <i>fepC</i> | iron-enterobactin transporter ATP-binding protein          | 4.50                | 7.64E-06              |
| *COG1169HQ                                          | STM14_0693       | STM0595        | <i>entC</i> | isochorismate synthase                                     | 3.42                | 4.84E-04              |
| <i>Lipid transport &amp; metabolism (I)</i>         |                  |                |             |                                                            |                     |                       |
| *COG1028IQR                                         | STM14_0696       | STM0598        | <i>entA</i> | 2,3-dihydroxybenzoate-2,3-dehydrogenase                    | 4.57                | 7.64E-06              |
| <i>Inorganic ion transport &amp; metabolism (P)</i> |                  |                |             |                                                            |                     |                       |
| COG1629P                                            | STM14_0228       | STM0191        | <i>fhuA</i> | ferrichrome outer membrane transporter                     | 4.05                | 1.04E-05              |
| COG0614P                                            | STM14_0230       | STM0193        | <i>fhuD</i> | iron-hydroxamate transporter substrate-binding subunit     | 4.18                | 1.53E-05              |
| COG0609P                                            | STM14_0231       | STM0194        | <i>fhuB</i> | iron-hydroxamate transporter permease subunit              | 4.46                | 5.57E-06              |
| COG4771P                                            | STM14_0682       | STM0585        | <i>fepA</i> | outer membrane receptor FepA                               | 2.40                | 1.97E-02              |
| *COG1120PH                                          | STM14_0688       | STM0590        | <i>fepC</i> | iron-enterobactin transporter ATP-binding protein          | 4.50                | 7.64E-06              |

|                                                                            |            |         |             |                                                              |      |          |
|----------------------------------------------------------------------------|------------|---------|-------------|--------------------------------------------------------------|------|----------|
| COG4592P                                                                   | STM14_0692 | STM0594 | <i>fepB</i> | iron-enterobactin transporter<br>periplasmic binding protein | 2.24 | 4.27E-02 |
| COG3615P                                                                   | STM14_1534 | STM1271 | <i>yeaR</i> | putative cytoplasmic protein                                 | 3.37 | 2.87E-04 |
| COG3615P                                                                   | STM14_2185 | STM1808 | -           | putative cytoplasmic protein                                 | 4.41 | 5.57E-06 |
| COG4771P                                                                   | STM14_2713 | STM2199 | <i>cirA</i> | colicin I receptor                                           | 2.37 | 2.74E-02 |
| COG0803P                                                                   | STM14_3458 | STM2861 | <i>sitA</i> | putative periplasmic binding protein                         | 2.67 | 7.65E-03 |
| COG2906P                                                                   | STM14_4147 | STM3444 | <i>bfd</i>  | bacterioferritin-associated<br>ferredoxin                    | 4.72 | 7.45E-07 |
| COG1918P                                                                   | STM14_4221 | STM3505 | <i>feoA</i> | ferrous iron transport protein A                             | 2.87 | 3.61E-03 |
| COG0370P                                                                   | STM14_4222 | STM3506 | <i>feoB</i> | ferrous iron transport protein B                             | 2.64 | 7.57E-03 |
| <i>Secondary metabolites biosynthesis, transport &amp; catabolism (Q)</i>  |            |         |             |                                                              |      |          |
| COG1020Q                                                                   | STM14_0686 | STM0588 | <i>entF</i> | enterobactin synthase subunit F                              | 3.03 | 1.75E-03 |
| *COG1169HQ                                                                 | STM14_0693 | STM0595 | <i>entC</i> | isochorismate synthase                                       | 3.42 | 4.84E-04 |
| COG1021Q                                                                   | STM14_0694 | STM0596 | <i>entE</i> | enterobactin synthase subunit E                              | 3.52 | 2.74E-04 |
| COG1535Q                                                                   | STM14_0695 | STM0597 | <i>entB</i> | 2,3-dihydro-2,3-dihydroxybenzoate<br>synthetase              | 5.58 | 1.23E-07 |
| *COG1028IQR                                                                | STM14_0696 | STM0598 | <i>entA</i> | 2,3-dihydroxybenzoate-2,3-<br>dehydrogenase                  | 4.57 | 7.64E-06 |
| COG0179Q                                                                   | STM14_2684 | STM2177 | -           | putative glutathione S-transferase                           | 2.62 | 1.21E-02 |
| <i>Transcription (K)</i>                                                   |            |         |             |                                                              |      |          |
| *COG2197TK                                                                 | STM14_3463 | STM2866 | <i>sprB</i> | transcriptional regulator                                    | 2.46 | 1.48E-02 |
| COG2207K                                                                   | STM14_3465 | STM2867 | <i>hilC</i> | invasion regulatory protein                                  | 2.21 | 3.85E-02 |
| <i>Defense mechanisms (V)</i>                                              |            |         |             |                                                              |      |          |
| COG0841V                                                                   | STM14_2626 | STM2128 | <i>yegO</i> | multidrug efflux system subunit<br>MdtC                      | 2.34 | 2.83E-02 |
| <i>Signal transduction mechanisms (T)</i>                                  |            |         |             |                                                              |      |          |
| *COG2197TK                                                                 | STM14_3463 | STM2866 | <i>sprB</i> | transcriptional regulator                                    | 2.46 | 1.48E-02 |
| <i>Cell wall/membrane/envelope biogenesis (M)</i>                          |            |         |             |                                                              |      |          |
| COG0810M                                                                   | STM14_2100 | STM1737 | <i>tonB</i> | transporter                                                  | 2.67 | 8.01E-03 |
| COG2222M                                                                   | STM14_4331 | STM3601 | -           | putative phosphosugar isomerase                              | 2.27 | 3.47E-02 |
| <i>Intracellular trafficking, secretion, &amp; vesicular transport (U)</i> |            |         |             |                                                              |      |          |
| COG0848U                                                                   | STM14_3824 | STM3158 | <i>exbD</i> | biopolymer transport protein ExbD                            | 2.19 | 4.24E-02 |
| <i>General function prediction only (R)</i>                                |            |         |             |                                                              |      |          |
| *COG1028IQR                                                                | STM14_0696 | STM0598 | <i>entA</i> | 2,3-dihydroxybenzoate-2,3-<br>dehydrogenase                  | 4.57 | 7.64E-06 |
| COG3467R                                                                   | STM14_0816 | STM0699 | -           | putative cytoplasmic protein                                 | 3.44 | 2.60E-04 |
| COG4114R                                                                   | STM14_5466 | STM4550 | <i>fhuF</i> | ferric hydroxamate transport ferric<br>iron reductase        | 2.62 | 1.04E-02 |
| <i>Function unknown (S)</i>                                                |            |         |             |                                                              |      |          |
| COG3391S                                                                   | STM14_1918 | STM1586 | -           | hypothetical protein                                         | 2.28 | 2.89E-02 |
| COG2128S                                                                   | STM14_3385 | STM2804 | -           | putative cytoplasmic protein                                 | 3.32 | 6.83E-04 |

|                     |            |          |             |                                        |      |          |
|---------------------|------------|----------|-------------|----------------------------------------|------|----------|
| COG1917S            | STM14_4895 | STM4071  | -           | putative mannose-6-phosphate isomerase | 2.31 | 2.89E-02 |
| <i>Not assigned</i> |            |          |             |                                        |      |          |
|                     | STM14_0227 | -        | -           | hypothetical protein                   | 3.75 | 4.88E-05 |
|                     | STM14_0819 | -        | -           | hypothetical protein                   | 2.21 | 3.85E-02 |
|                     | STM14_1535 | STM1272  | <i>yoaG</i> | putative cytoplasmic protein           | 3.03 | 1.38E-03 |
|                     | STM14_1885 | STM1562  | <i>hdeB</i> | acid-resistance protein                | 7.12 | 1.78E-13 |
|                     | STM14_2227 | STM1841  | -           | hypothetical protein                   | 2.55 | 1.12E-02 |
|                     | STM14_2269 | STM1868A | -           | lytic enzyme                           | 3.17 | 7.45E-04 |
|                     | STM14_2270 | -        | -           | hypothetical protein                   | 3.29 | 4.18E-04 |
|                     | STM14_2271 | -        | -           | hypothetical protein                   | 4.24 | 7.82E-06 |
|                     | STM14_3456 | STM2860  | <i>ygbA</i> | hypothetical protein                   | 4.20 | 7.64E-06 |
|                     | STM14_4223 | STM3507  | <i>yhgG</i> | putative cytoplasmic protein           | 2.82 | 5.37E-03 |

\*Genes assigned to more than one COG

**Table S5: Down-regulated genes under acidified NaNO<sub>2</sub> adaptation in *S. Typhimurium* 14028 WT**

| COG                                           | 14028 identifier | LT2 identifier | Gene name   | Product                                          | log <sub>2</sub> FC | p-value (BH-adjusted) |
|-----------------------------------------------|------------------|----------------|-------------|--------------------------------------------------|---------------------|-----------------------|
| <i>Energy production &amp; conversion (C)</i> |                  |                |             |                                                  |                     |                       |
| COG0243C                                      | STM14_1089       | STM0964        | <i>dmsA</i> | anaerobic dimethyl sulfoxide reductase subunit A | -2.75               | 4.94E-03              |
| COG0437C                                      | STM14_1090       | STM0965        | <i>dmsB</i> | anaerobic dimethyl sulfoxide reductase subunit B | -4.56               | 1.04E-05              |
| COG0243C                                      | STM14_1677       | STM1383        | <i>ttrA</i> | tetrathionate reductase complex subunit A        | -3.88               | 2.38E-05              |
| COG0437C                                      | STM14_1679       | STM1385        | <i>ttrB</i> | tetrathionate reductase complex subunit B        | -2.19               | 4.10E-02              |
| COG0437C                                      | STM14_1893       | STM1569        | <i>fdnH</i> | formate dehydrogenase-N beta subunit             | -2.84               | 3.75E-03              |
| COG2181C                                      | STM14_2129       | STM1761        | <i>narI</i> | nitrate reductase 1 subunit gamma                | -2.54               | 1.12E-02              |
| COG2180C                                      | STM14_2130       | STM1762        | <i>narJ</i> | nitrate reductase 1 subunit delta                | -2.51               | 1.21E-02              |
| COG1140C                                      | STM14_2131       | STM1763        | <i>narH</i> | nitrate reductase 1 subunit beta                 | -2.61               | 7.95E-03              |
| COG3005C                                      | STM14_2784       | STM2255        | <i>napC</i> | cytochrome c-type protein NapC                   | -3.97               | 1.53E-05              |
| COG3043C                                      | STM14_2785       | STM2256        | <i>napB</i> | diheme cytochrome c550                           | -4.31               | 5.57E-06              |
| COG0348C                                      | STM14_2786       | STM2257        | <i>napH</i> | quinol dehydrogenase membrane component          | -3.73               | 5.57E-05              |
| COG0437C                                      | STM14_2787       | STM2258        | <i>napG</i> | quinol dehydrogenase periplasmic component       | -4.34               | 1.04E-05              |
| COG0243C                                      | STM14_2788       | STM2259        | <i>napA</i> | nitrate reductase                                | -3.26               | 4.84E-04              |



|                                                     |            |           |             |                                                                    |       |          |
|-----------------------------------------------------|------------|-----------|-------------|--------------------------------------------------------------------|-------|----------|
| COG4231C                                            | STM14_2790 | STM2261   | <i>napF</i> | ferredoxin-type protein                                            | -2.51 | 1.21E-02 |
| COG0243C                                            | STM14_3103 | STM2530   | -           | putative anaerobic<br>dimethylsulfoxide reductase                  | -2.71 | 8.23E-03 |
| COG0243C                                            | STM14_5178 | STM4305.S | -           | putative anaerobic<br>dimethylsulfoxide reductase<br>subunit A     | -2.51 | 1.26E-02 |
| COG0437C                                            | STM14_5179 | STM4306   | -           | putative anaerobic<br>dimethylsulfoxide reductase<br>subunit B     | -3.23 | 8.77E-04 |
| <i>Carbohydrate transport &amp; metabolism (G)</i>  |            |           |             |                                                                    |       |          |
| COG3414G                                            | STM14_2888 | STM2343   | -           | putative cytoplasmic protein                                       | -2.32 | 3.85E-02 |
| <i>Amino acid transport &amp; metabolism (E)</i>    |            |           |             |                                                                    |       |          |
| COG0747E                                            | STM14_1515 | STM1255   | -           | putative ABC transporter<br>periplasmic binding protein            | -2.28 | 2.89E-02 |
| *COG0601EP                                          | STM14_1516 | STM1256   | -           | putative ABC transporter protein                                   | -2.34 | 2.53E-02 |
| *COG1173EP                                          | STM14_1517 | STM1257   | -           | putative ABC transporter protein                                   | -2.45 | 1.75E-02 |
| *COG1124EP                                          | STM14_1519 | STM1259   | -           | ABC transporter ATP-binding<br>protein                             | -2.71 | 6.49E-03 |
| <i>Inorganic ion transport &amp; metabolism (P)</i> |            |           |             |                                                                    |       |          |
| *COG0601EP                                          | STM14_1516 | STM1256   | -           | putative ABC transporter protein                                   | -2.34 | 2.53E-02 |
| *COG1173EP                                          | STM14_1517 | STM1257   | -           | putative ABC transporter protein                                   | -2.45 | 1.75E-02 |
| *COG1124EP                                          | STM14_1519 | STM1259   | -           | ABC transporter ATP-binding<br>protein                             | -2.71 | 6.49E-03 |
| COG3301P                                            | STM14_1678 | STM1384   | <i>ttrC</i> | tetrathionate reductase complex<br>subunit C                       | -2.63 | 7.70E-03 |
| COG1528P                                            | STM14_2353 | STM1935   | <i>ftn</i>  | ferritin                                                           | -2.81 | 3.75E-03 |
| COG3062P                                            | STM14_2789 | STM2260   | <i>napD</i> | assembly protein for periplasmic<br>nitrate reductase              | -2.94 | 2.51E-03 |
| COG1118P                                            | STM14_3716 | STM3075   | -           | putative ABC-type cobalt transport<br>system ATP-binding component | -2.52 | 1.93E-02 |
| COG1858P                                            | STM14_4612 | STM3820   | -           | putative cytochrome c peroxidase                                   | -2.61 | 8.01E-03 |
| COG0376P                                            | STM14_4936 | STM4106   | <i>katG</i> | hydroperoxidase                                                    | -2.38 | 1.97E-02 |
| COG3303P                                            | STM14_5143 | STM4277   | <i>nrfA</i> | cytochrome c nitrite reductase                                     | -3.44 | 2.60E-04 |
| <i>Transcription (K)</i>                            |            |           |             |                                                                    |       |          |
| *COG0378OK                                          | STM14_3451 | STM2855   | <i>hypB</i> | hydrogenase nickel incorporation<br>protein HypB                   | -2.50 | 1.33E-02 |
| *COG3604KT                                          | STM14_3455 | STM2859   | <i>fhIA</i> | formate hydrogen-lyase<br>transcriptional activator                | -2.20 | 4.28E-02 |
| <i>Signal transduction mechanisms (T)</i>           |            |           |             |                                                                    |       |          |
| *COG3604KT                                          | STM14_3455 | STM2859   | <i>fhIA</i> | formate hydrogen-lyase<br>transcriptional activator                | -2.20 | 4.28E-02 |

*Cell wall/membrane/envelope biogenesis (M)*

|          |            |         |             |                          |       |          |
|----------|------------|---------|-------------|--------------------------|-------|----------|
| COG3047M | STM14_2095 | STM1732 | <i>ompW</i> | outer membrane protein W | -2.30 | 2.78E-02 |
|----------|------------|---------|-------------|--------------------------|-------|----------|

*Cell motility (N)*

|            |            |         |             |                                 |       |          |
|------------|------------|---------|-------------|---------------------------------|-------|----------|
| *COG3188NU | STM14_2653 | STM2150 | <i>stcC</i> | putative outer membrane protein | -2.55 | 1.26E-02 |
|------------|------------|---------|-------------|---------------------------------|-------|----------|

|            |            |         |             |                                |       |          |
|------------|------------|---------|-------------|--------------------------------|-------|----------|
| *COG3539NU | STM14_2655 | STM2152 | <i>stcA</i> | putative fimbrial-like protein | -3.72 | 5.44E-05 |
|------------|------------|---------|-------------|--------------------------------|-------|----------|

*Intracellular trafficking, secretion & vesicular transport (U)*

|            |            |         |             |                                 |       |          |
|------------|------------|---------|-------------|---------------------------------|-------|----------|
| *COG3188NU | STM14_2653 | STM2150 | <i>stcC</i> | putative outer membrane protein | -2.55 | 1.26E-02 |
|------------|------------|---------|-------------|---------------------------------|-------|----------|

|            |            |         |             |                                |       |          |
|------------|------------|---------|-------------|--------------------------------|-------|----------|
| *COG3539NU | STM14_2655 | STM2152 | <i>stcA</i> | putative fimbrial-like protein | -3.72 | 5.44E-05 |
|------------|------------|---------|-------------|--------------------------------|-------|----------|

*Posttranslational modification, protein turnover, chaperones (O)*

|          |            |         |               |                                         |       |          |
|----------|------------|---------|---------------|-----------------------------------------|-------|----------|
| COG4133O | STM14_2783 | STM2254 | <i>ccmA_1</i> | cytochrome c biogenesis protein<br>CcmA | -3.11 | 2.52E-03 |
|----------|------------|---------|---------------|-----------------------------------------|-------|----------|

|            |            |         |             |                                                  |       |          |
|------------|------------|---------|-------------|--------------------------------------------------|-------|----------|
| *COG0378OK | STM14_3451 | STM2855 | <i>hypB</i> | hydrogenase nickel incorporation<br>protein HypB | -2.50 | 1.33E-02 |
|------------|------------|---------|-------------|--------------------------------------------------|-------|----------|

|          |            |         |             |                                           |       |          |
|----------|------------|---------|-------------|-------------------------------------------|-------|----------|
| COG0409O | STM14_3453 | STM2857 | <i>hypD</i> | putative hydrogenase formation<br>protein | -2.18 | 4.66E-02 |
|----------|------------|---------|-------------|-------------------------------------------|-------|----------|

|          |            |         |             |                                           |       |          |
|----------|------------|---------|-------------|-------------------------------------------|-------|----------|
| COG0309O | STM14_3454 | STM2858 | <i>hypE</i> | putative hydrogenase formation<br>protein | -2.97 | 3.19E-03 |
|----------|------------|---------|-------------|-------------------------------------------|-------|----------|

|          |            |         |             |                   |       |          |
|----------|------------|---------|-------------|-------------------|-------|----------|
| COG0826O | STM14_3956 | STM3274 | <i>yhbU</i> | putative protease | -2.78 | 4.70E-03 |
|----------|------------|---------|-------------|-------------------|-------|----------|

|          |            |           |             |                   |       |          |
|----------|------------|-----------|-------------|-------------------|-------|----------|
| COG0826O | STM14_3957 | STM3275.S | <i>yhbV</i> | putative protease | -3.51 | 2.12E-04 |
|----------|------------|-----------|-------------|-------------------|-------|----------|

|          |            |         |             |                                     |       |          |
|----------|------------|---------|-------------|-------------------------------------|-------|----------|
| COG1138O | STM14_5147 | STM4281 | <i>nrfE</i> | formate-dependent nitrite reductase | -2.94 | 4.57E-03 |
|----------|------------|---------|-------------|-------------------------------------|-------|----------|

|          |            |         |             |                                             |       |          |
|----------|------------|---------|-------------|---------------------------------------------|-------|----------|
| COG1180O | STM14_5484 | STM4565 | <i>yjjW</i> | pyruvate formate lyase-activating<br>enzyme | -2.31 | 3.81E-02 |
|----------|------------|---------|-------------|---------------------------------------------|-------|----------|

*General function prediction only (R)*

|          |            |         |   |                                        |       |          |
|----------|------------|---------|---|----------------------------------------|-------|----------|
| COG1123R | STM14_1518 | STM1258 | - | ABC transporter ATP-binding<br>protein | -3.18 | 8.66E-04 |
|----------|------------|---------|---|----------------------------------------|-------|----------|

|          |            |            |   |                                    |       |          |
|----------|------------|------------|---|------------------------------------|-------|----------|
| COG2962R | STM14_3601 | STM2986.Sc | - | putative integral membrane protein | -2.64 | 7.65E-03 |
|----------|------------|------------|---|------------------------------------|-------|----------|

|          |            |         |   |                              |       |          |
|----------|------------|---------|---|------------------------------|-------|----------|
| COG1661R | STM14_3712 | STM3071 | - | putative DNA-binding protein | -2.82 | 4.57E-03 |
|----------|------------|---------|---|------------------------------|-------|----------|

|          |            |         |               |                                                  |       |          |
|----------|------------|---------|---------------|--------------------------------------------------|-------|----------|
| COG0375R | STM14_3808 | STM3144 | <i>hypA_2</i> | hydrogenase nickel incorporation<br>protein HybF | -2.25 | 4.48E-02 |
|----------|------------|---------|---------------|--------------------------------------------------|-------|----------|

|          |            |         |   |                                               |       |          |
|----------|------------|---------|---|-----------------------------------------------|-------|----------|
| COG3381R | STM14_5181 | STM4308 | - | putative anaerobic dehydrogenase<br>component | -3.24 | 8.34E-04 |
|----------|------------|---------|---|-----------------------------------------------|-------|----------|

*Function unknown (S)*

|          |            |         |             |                      |       |          |
|----------|------------|---------|-------------|----------------------|-------|----------|
| COG1584S | STM14_0009 | STM0009 | <i>yaaH</i> | hypothetical protein | -2.62 | 1.22E-02 |
|----------|------------|---------|-------------|----------------------|-------|----------|

*Not assigned*

|            |   |   |   |                      |       |          |
|------------|---|---|---|----------------------|-------|----------|
| STM14_1092 | - | - | - | hypothetical protein | -2.48 | 2.17E-02 |
|------------|---|---|---|----------------------|-------|----------|

|            |         |             |   |                              |       |          |
|------------|---------|-------------|---|------------------------------|-------|----------|
| STM14_2354 | STM1936 | <i>yecH</i> | - | putative cytoplasmic protein | -2.32 | 2.89E-02 |
|------------|---------|-------------|---|------------------------------|-------|----------|

|            |         |             |   |                                        |       |          |
|------------|---------|-------------|---|----------------------------------------|-------|----------|
| STM14_2652 | STM2149 | <i>stcD</i> | - | putative outer membrane<br>lipoprotein | -2.46 | 1.82E-02 |
|------------|---------|-------------|---|----------------------------------------|-------|----------|

|            |   |   |   |                      |       |          |
|------------|---|---|---|----------------------|-------|----------|
| STM14_3211 | - | - | - | hypothetical protein | -2.59 | 8.23E-03 |
|------------|---|---|---|----------------------|-------|----------|

|            |         |   |   |                                 |       |          |
|------------|---------|---|---|---------------------------------|-------|----------|
| STM14_3713 | STM3072 | - | - | putative inner membrane protein | -2.77 | 4.84E-03 |
|------------|---------|---|---|---------------------------------|-------|----------|

|            |         |             |   |                      |       |          |
|------------|---------|-------------|---|----------------------|-------|----------|
| STM14_5485 | STM4566 | <i>yjjI</i> | - | hypothetical protein | -2.22 | 3.85E-02 |
|------------|---------|-------------|---|----------------------|-------|----------|

---

\*Genes assigned to more than one COG
